# Supplementary material for: Enhanced electrocatalytic activity and stability of high performance symmetrical solid oxide fuel cells with praseodymium-doped SrCo0.2Fe0.8O3−δ electrodes
Source: Royal Society of Chemistry journal article supplement (doi:10.1039/d4ta06084a), 2024-01-01
Supplement: d4ta06084a1.pdf [file d4ta06084a1.pdf]

**Enhanced Electrocatalytic Activity and Stability for High Performance Symmetrical Solid Oxide Fuel Cells with Praseodymium-Doped SrCo<sub>0.2</sub>Fe<sub>0.8</sub>O<sub>3-δ</sub> Electrodes**

Peng Li<sup>1#</sup>, Bing Yang<sup>1#</sup>, Jing Chen<sup>1\*</sup>, Bo Li<sup>1</sup>, Lushan Ma<sup>1</sup>, Mengjia Wang, Xuzhuo Sun<sup>1\*</sup>, Yunfeng Tian<sup>2\*</sup>, Bo Chi<sup>3</sup>

1. School of Chemistry and Chemical Engineering, Henan University of Technology, Zhengzhou 450001, China
2. School of Materials Science and Physics, China University of Mining and Technology, Xuzhou 221116, PR China
3. Center for Fuel Cell Innovation, State Key Laboratory of Material Processing and Die & Mould Technology, School of Materials Science and Engineering, Huazhong University of Science and Technology, Wuhan, Hubei 430074, China

#These authors have contributed equally to the work.

\*Corresponding author.

Email: yunfengup@cumt.edu.cn (Dr. Yunfeng Tian), [sunxuzhuo@haut.edu.cn](mailto:sunxuzhuo@haut.edu.cn) (Dr. Xuzhuo Sun), chenjing0504@haut.edu.cn (Prof. Jing Chen)

Table S1. XRD refinement results for  $P_{0.2}SCF$ ,  $P_{0.2}SCF@2$  及  $P_{0.2}SCF@100$ .

|                 |                    | $P_{0.2}SCF$ | $P_{0.2}SCF@2$ | $P_{0.2}SCF@100$ |
|-----------------|--------------------|--------------|----------------|------------------|
| space group     |                    | P/mmm        | P/mmm          | P/mmm            |
|                 | a(Å)               | 3.8506       | 3.8505         | 3.8518           |
| Cell parameters | b(Å)               | 2.7229       | 2.7228         | 2.7234           |
|                 | c(Å)               | 2.5673       | 2.5674         | 2.7235           |
| cell volume     | V(Å <sup>3</sup> ) | 26.917       | 26.916         | 28.560           |

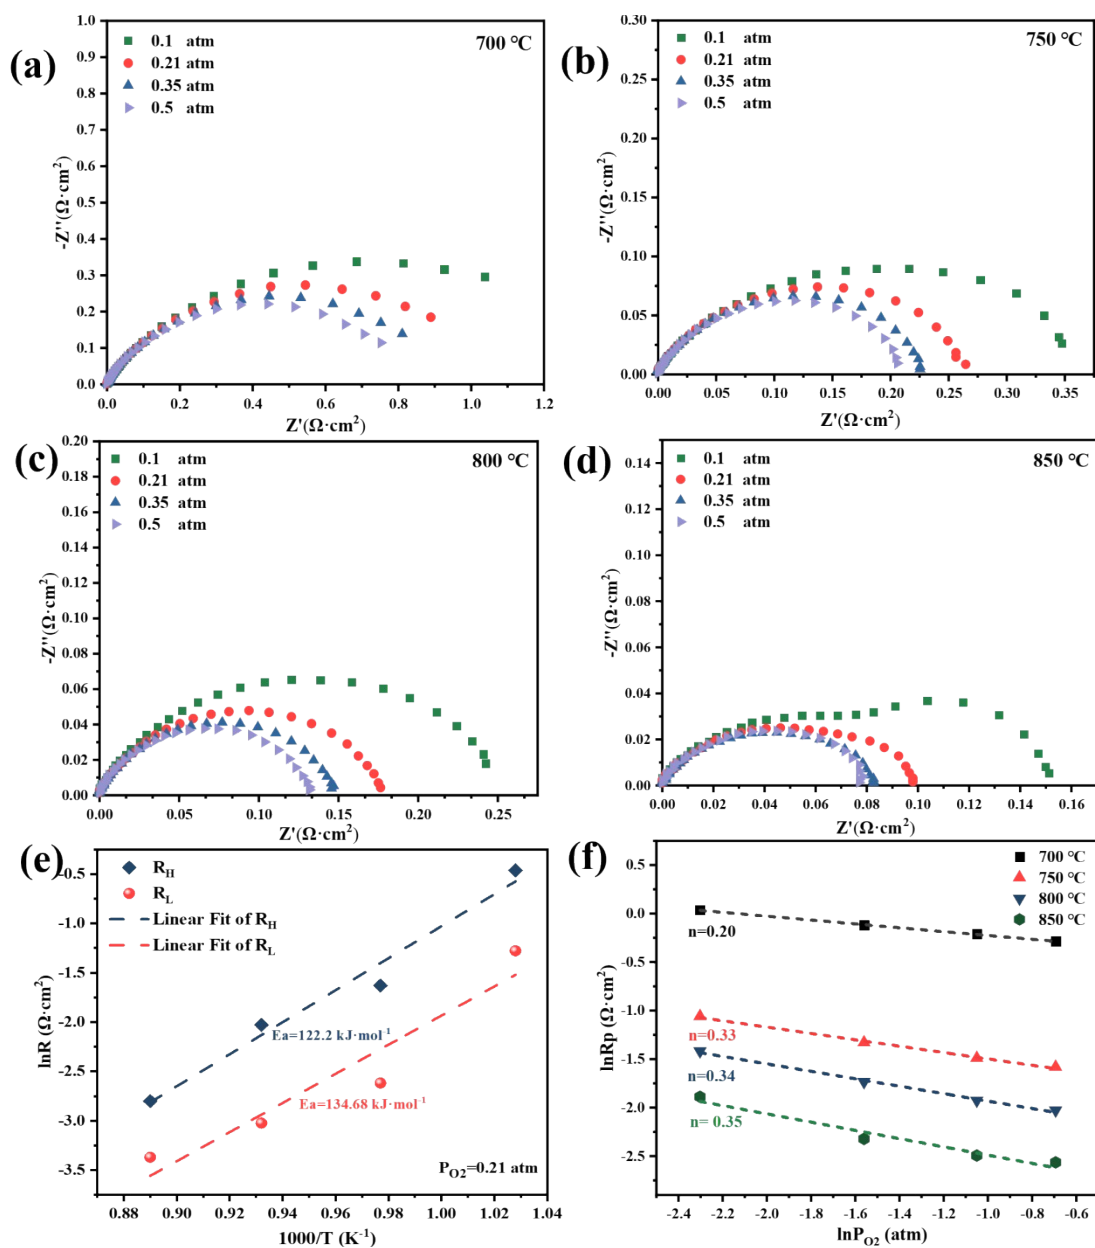

Figure S1. (a, b, c, d) Impedance spectra at 700 °C, 750 °C, 800 °C, and 850 °C at different oxygen partial pressures, (e) Arrhenius plots of  $R_{\text{H}}$ , and  $R_{\text{L}}$  versus temperature in air, and (f) correlation of different oxygen partial pressures in the range of 700-850 °C with  $R_p$ .

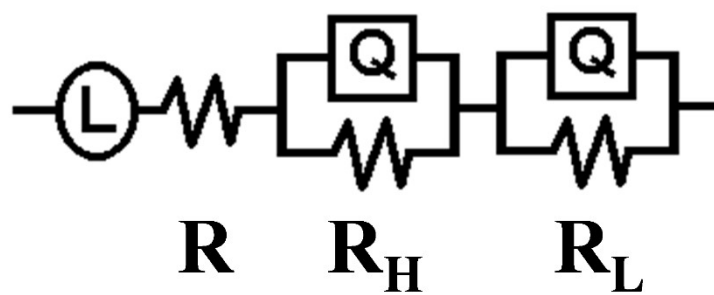

Figure S2. Equivalent Circuit Fitting Model.

Table S2.  $R_p$  value fitting results for P0.2SCF cathode at the same temperature with different oxygen partial pressures

| T/°C | $P_{O_2}/\text{atm}$ | $R_p/\Omega \cdot \text{cm}^2$ | $R_H/\Omega \cdot \text{cm}^2$ | $R_L/\Omega \cdot \text{cm}^2$ |
|------|----------------------|--------------------------------|--------------------------------|--------------------------------|
| 700  | 0.1                  | 1.0374                         | 0.7462                         | 0.3402                         |
|      | 0.21                 | 0.889                          | 0.630                          | 0.2786                         |
|      | 0.35                 | 0.811                          | 0.6076                         | 0.203                          |
|      | 0.5                  | 0.752                          | 0.5908                         | 0.1736                         |
| 750  | 0.1                  | 0.3472                         | 0.2241                         | 0.1247                         |
|      | 0.21                 | 0.2646                         | 0.196                          | 0.07294                        |
|      | 0.35                 | 0.2254                         | 0.1708                         | 0.05978                        |
|      | 0.5                  | 0.2058                         | 0.1652                         | 0.04858                        |
| 800  | 0.1                  | 0.2422                         | 0.1624                         | 0.07854                        |
|      | 0.21                 | 0.1764                         | 0.1315                         | 0.04858                        |
|      | 0.35                 | 0.1456                         | 0.1099                         | 0.04004                        |
|      | 0.5                  | 0.1316                         | 0.09422                        | 0.03822                        |
| 850  | 0.1                  | 0.152                          | 0.08192                        | 0.06828                        |
|      | 0.21                 | 0.098                          | 0.06622                        | 0.0343                         |
|      | 0.35                 | 0.0826                         | 0.05824                        | 0.02646                        |
|      | 0.5                  | 0.077                          | 0.05446                        | 0.02338                        |

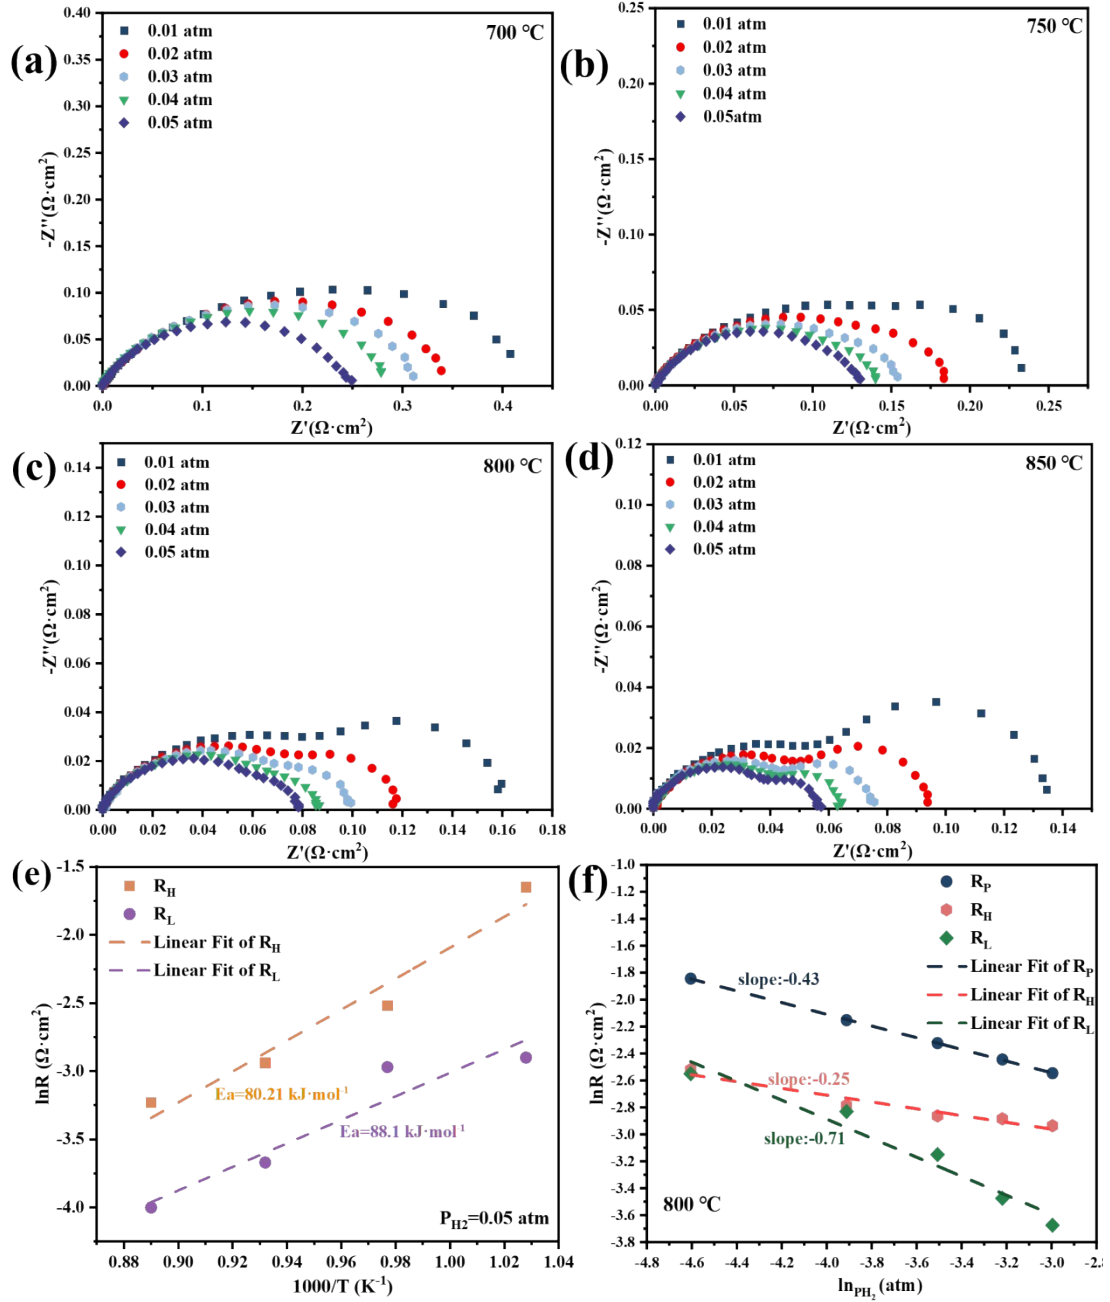

Figure S3. (a) Impedance spectra of different hydrogen partial pressures at 700 °C. (b) Impedance spectra of different hydrogen partial pressures at 750 °C, (c) Impedance spectra of different hydrogen partial pressures at 800 °C, (d) Impedance spectra of different hydrogen partial pressures at 850 °C, (e) Arrhenius plots of  $R_{\text{H}}$ ,  $R_{\text{L}}$  versus temperature for a hydrogen partial pressure of 0.05 atm, and (f) Dependence of  $R_{\text{L}}$  and  $R_{\text{H}}$  on hydrogen partial pressure at 800 °C.

Table S3.  $R_p$  value fitting results for P0.2SCF anode at the same temperature and different hydrogen partial pressures.

| T/°C | $P_{H_2}$ /atm | $R_p/\Omega \cdot \text{cm}^2$ | $R_H/\Omega \cdot \text{cm}^2$ | $R_L/\Omega \cdot \text{cm}^2$ |
|------|----------------|--------------------------------|--------------------------------|--------------------------------|
| 700  | 0.01           | 0.4074                         | 0.2698                         | 0.1402                         |
|      | 0.02           | 0.3388                         | 0.2604                         | 0.08862                        |
|      | 0.03           | 0.3108                         | 0.2506                         | 0.06874                        |
|      | 0.04           | 0.2786                         | 0.2254                         | 0.06272                        |
|      | 0.05           | 0.2492                         | 0.1918                         | 0.05390                        |
| 750  | 0.01           | 0.2324                         | 0.1376                         | 0.1014                         |
|      | 0.02           | 0.1834                         | 0.1050                         | 0.08480                        |
|      | 0.03           | 0.1540                         | 0.08806                        | 0.07210                        |
|      | 0.04           | 0.1410                         | 0.08512                        | 0.05890                        |
|      | 0.05           | 0.1302                         | 0.08008                        | 0.05090                        |
| 800  | 0.01           | 0.1582                         | 0.08050                        | 0.07810                        |
|      | 0.02           | 0.1162                         | 0.06174                        | 0.05894                        |
|      | 0.03           | 0.098                          | 0.05710                        | 0.04284                        |
|      | 0.04           | 0.0868                         | 0.05586                        | 0.03094                        |
|      | 0.05           | 0.0784                         | 0.05307                        | 0.02533                        |
| 850  | 0.01           | 0.1344                         | 0.07031                        | 0.06392                        |
|      | 0.02           | 0.0938                         | 0.05404                        | 0.04004                        |
|      | 0.03           | 0.0756                         | 0.04368                        | 0.03318                        |
|      | 0.04           | 0.0630                         | 0.04224                        | 0.02086                        |
|      | 0.05           | 0.0574                         | 0.03920                        | 0.01834                        |

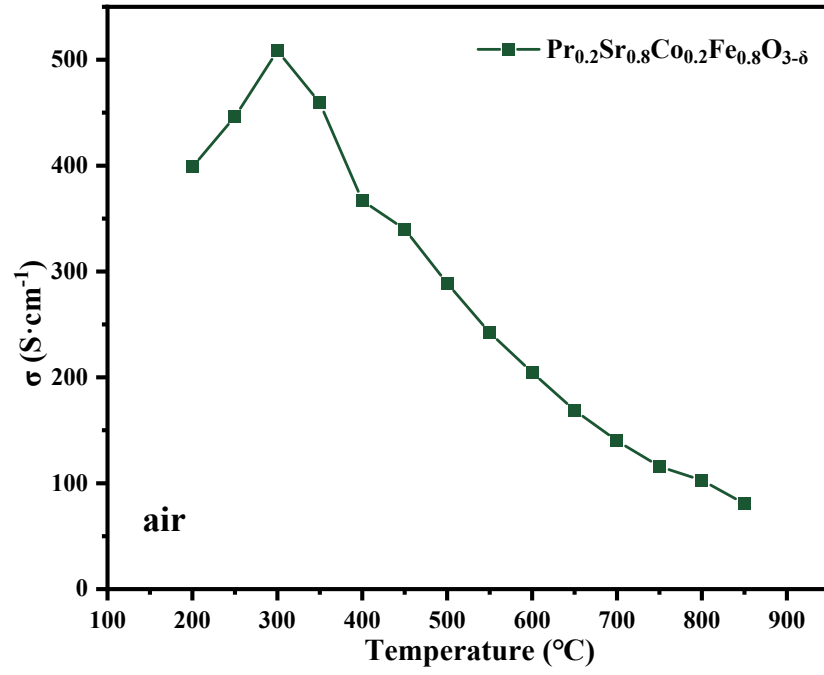

Figure S4. Conductivity ( $\sigma$ ) versus temperature for P0.2SCF in air atmosphere.
